# Supplementary material for: PET modulated fluorescent sensing from the BF2 chelated azadipyrromethene platform
Source: Royal Society of Chemistry journal article supplement (doi:10.1039/b514788c), 2006-01-01
Supplement: b514788c.pdf [file b514788c.pdf]

# Electronic Supporting Information

## PET Modulated Fluorescent Sensing from the BF<sub>2</sub> Chelated Azadipyrromethene Platform

Michael J. Hall, Lorcan T. Allen and Donal F. O'Shea\*

*Centre for Synthesis and Chemical Biology, Conway Institute, School of Chemistry and Chemical Biology, University College Dublin, Belfield, Dublin 4, Ireland. Tel: +353 (0) 17162425;  
E-mail: donal.f.oshea@ucd.ie*

### Table of Contents

|                                                       |   |
|-------------------------------------------------------|---|
| <sup>1</sup> H and <sup>13</sup> C NMR of <b>1a</b> . | 2 |
| <sup>1</sup> H and <sup>13</sup> C NMR of <b>1b</b> . | 3 |
| Absorbance solvent study of <b>1a</b> .               | 4 |
| Fluorescence solvent study of <b>1a</b> .             | 5 |
| Absorbance solvent study of <b>1b</b> .               | 6 |
| Fluorescence solvent study of <b>1b</b> .             | 7 |
| pKa Titration of <b>1b</b> .                          | 8 |

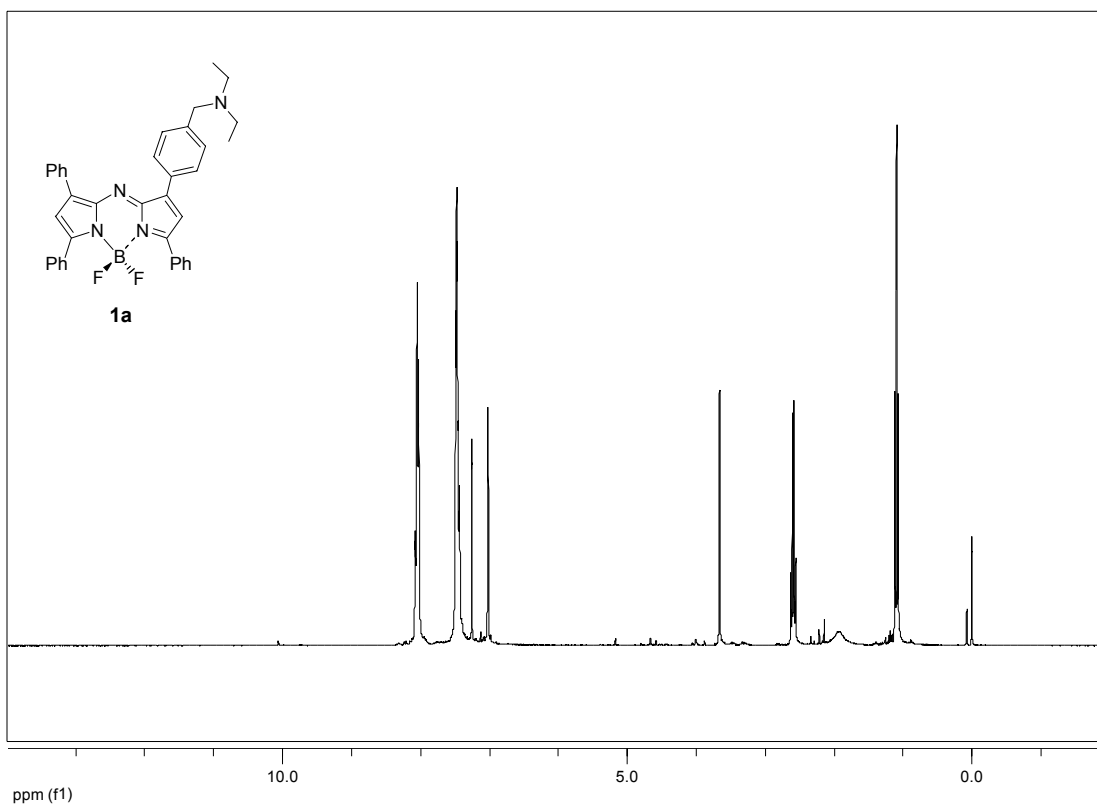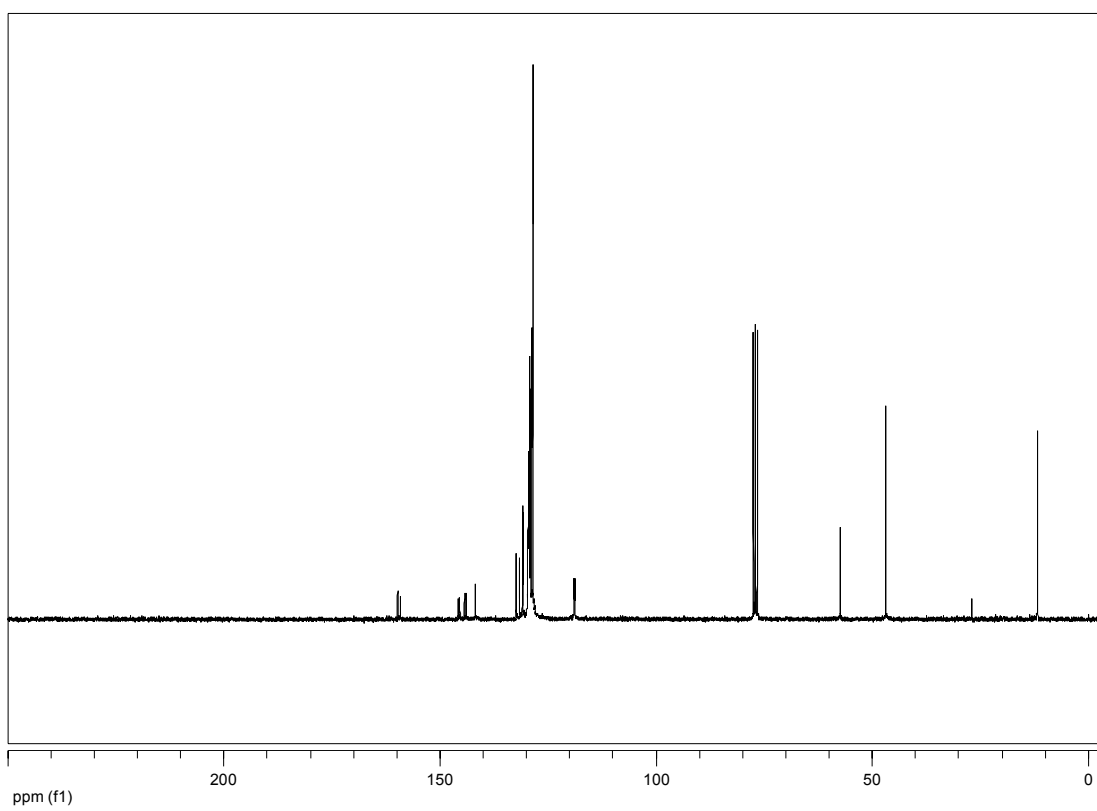

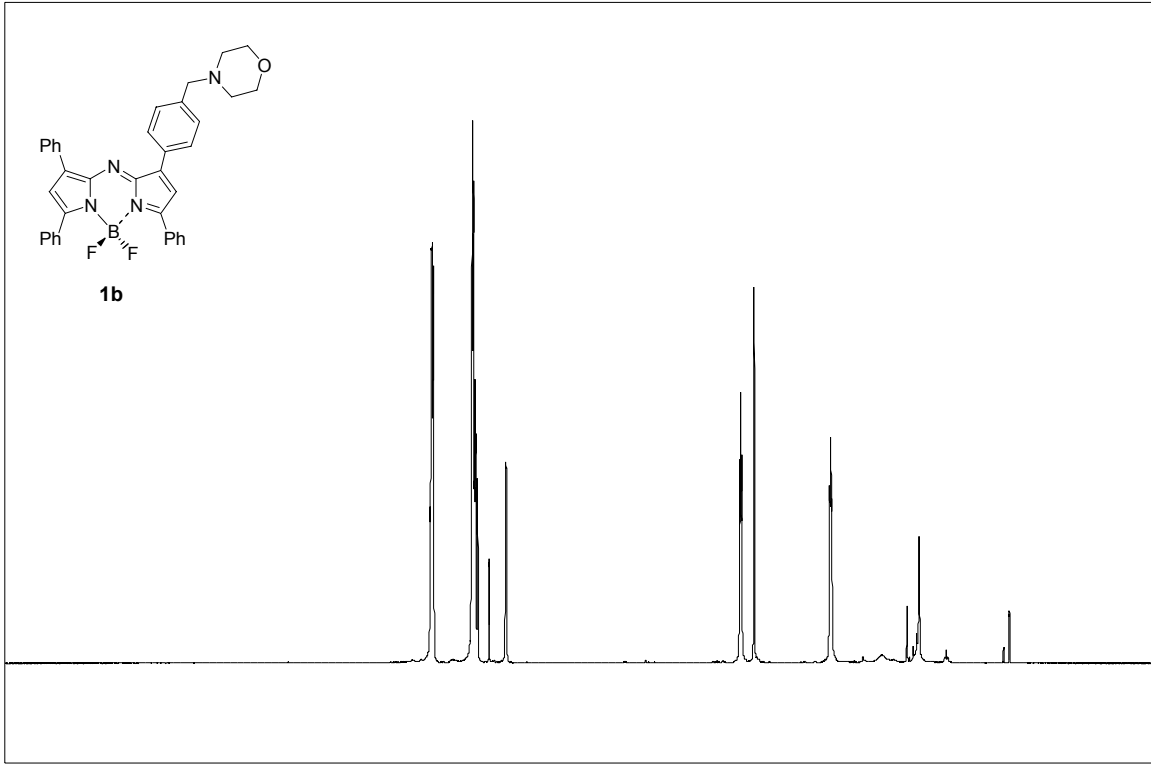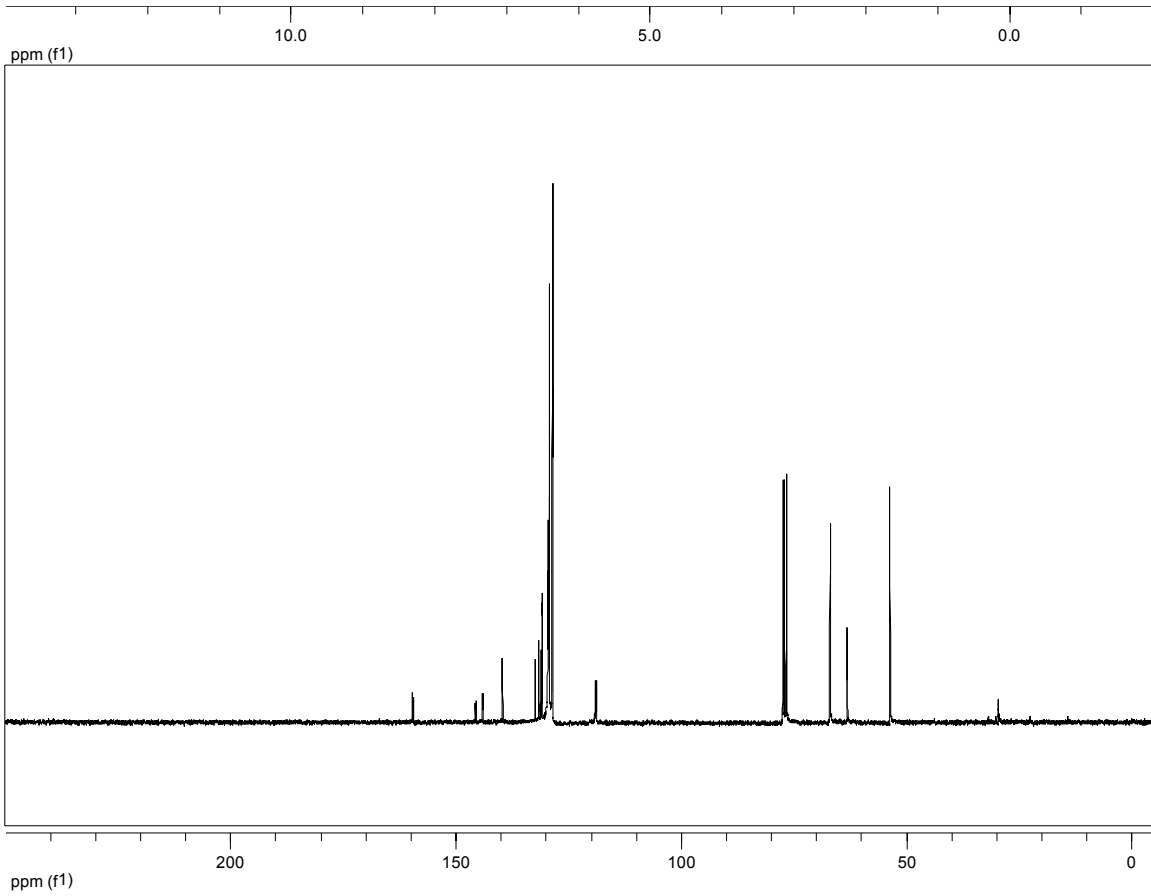

### UV/Vis Absorbance 1a ( $1 \times 10^{-5}$ M)

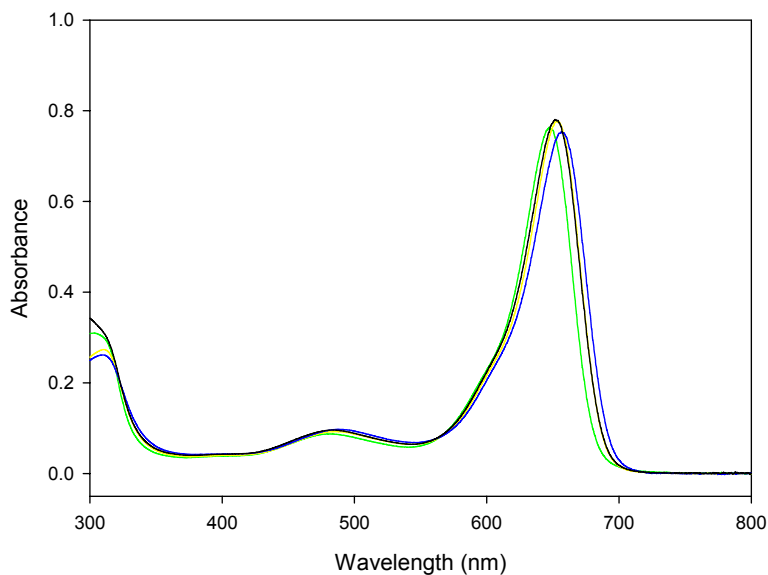

DMF (blue), THF (yellow), 1,4-dioxane (black), Cyclohexane (green)

### UV/Vis Absorbance 1a plus 5 $\mu$ L TFA ( $1 \times 10^{-5}$ M)

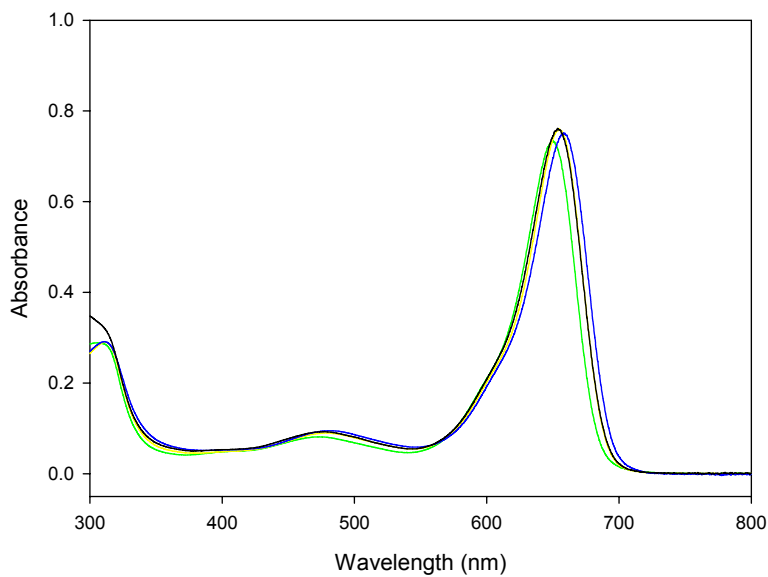

DMF (blue), THF (yellow), 1,4-dioxane (black), Cyclohexane (green)

## Fluorescence of 1a plus 5 $\mu$ L TFA

### Off / On in DMF

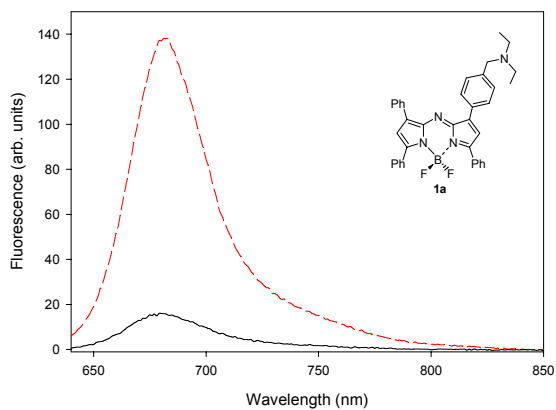

### Off / On in THF

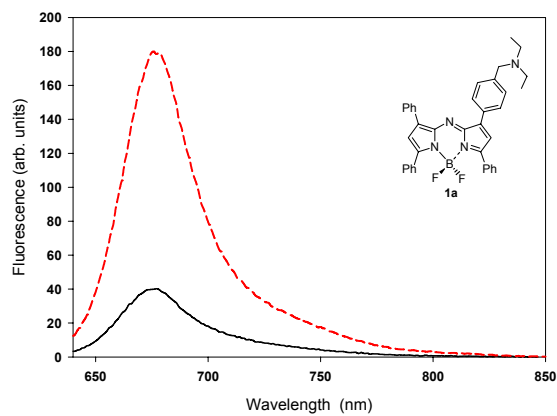

### Off / On in dioxane

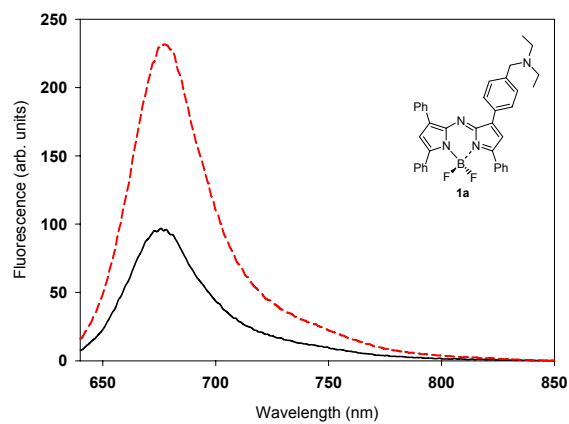

### Off / On in cyclohexane

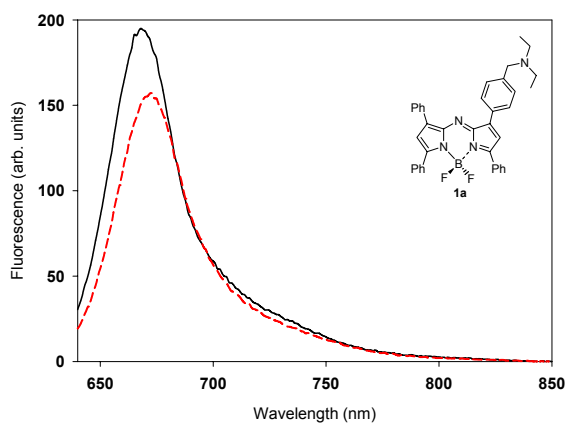

### UV/Vis Absorbance 1b ( $1 \times 10^{-5}$ M)

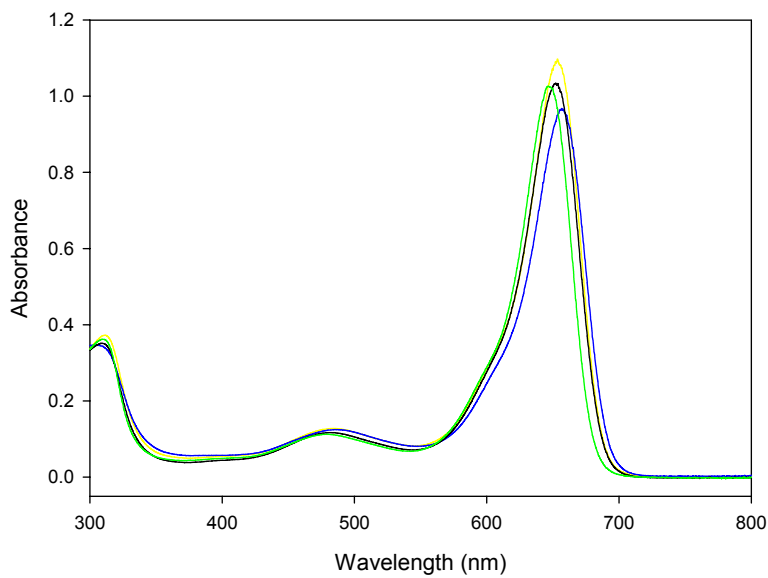

DMF (blue), THF (yellow), 1,4-dioxane (black), Cyclohexane (green)

### UV/Vis Absorbance 1b plus 5 $\mu$ L TFA ( $1 \times 10^{-5}$ M)

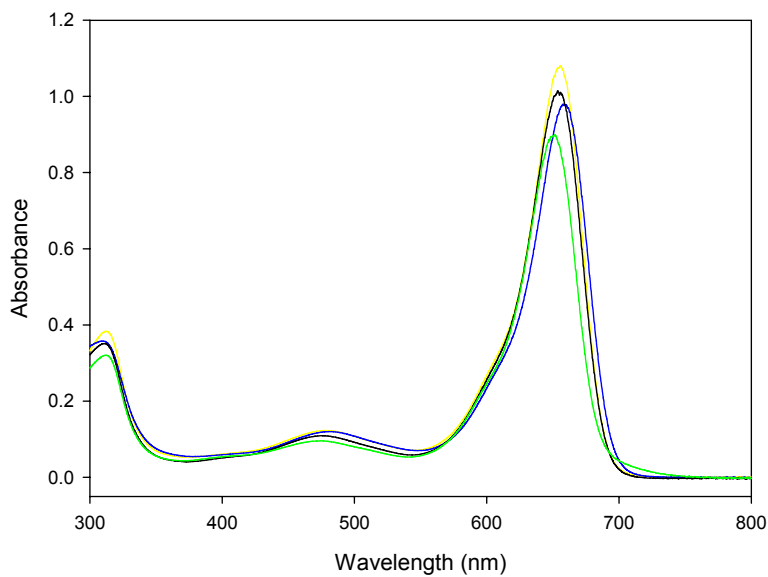

DMF (blue), THF (yellow), 1,4-dioxane (black), Cyclohexane (green)

## Fluorescence of 1b plus 5 $\mu$ L TFA

### Off / On in DMF

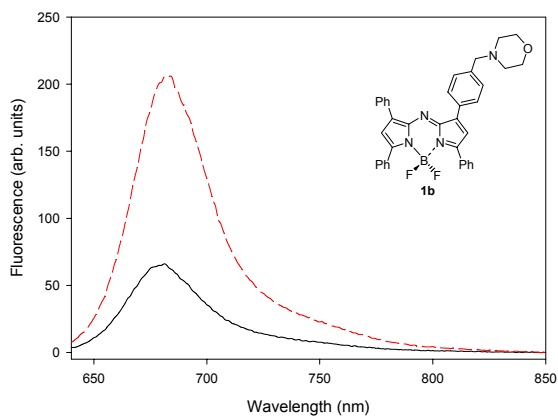

### Off / On in THF

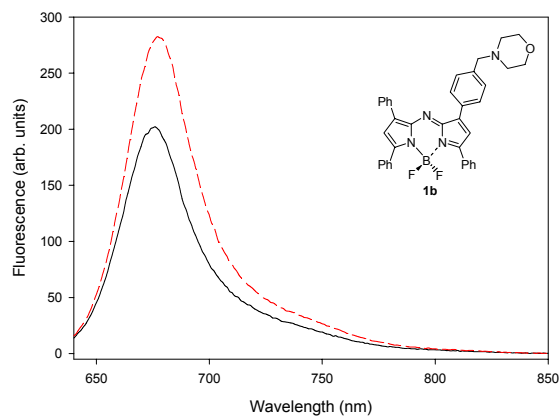

### Off / On in dioxane

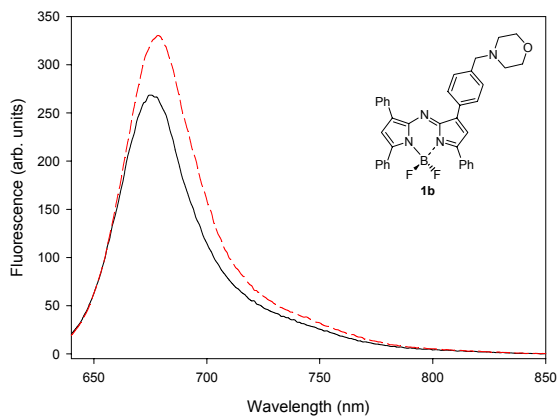

### Off / On in cyclohexane

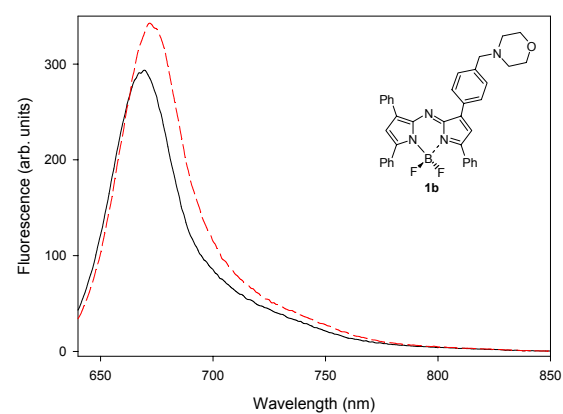

### **pKa Measurements of 1a and 1b.**

**1a** or **1b** (0.005 mmol) was dissolved THF (1 mL), CrEL (0.1 mL) was added and the sample was placed in a sonic bath for 30 min. The THF was removed under reduced pressure and the oily mixture was slowly dissolved in phosphate buffered saline (PBS) (10 mL) and passed through an Acrodisc 25 mm syringe filter (with 0.2  $\mu\text{m}$  HT Tuffryn membrane). A portion (1 mL) of the first solution was diluted with PBS to 25 mL, and a portion (2.5 mL) of this solution was further diluted with PBS to 25 mL. This sample was stirred in a beaker with a pH probe. The solution was acidified with HCl (37%, 10  $\mu\text{L}$ ), the pH was recorded and the fluorescence spectrum was recorded. A portion of NaOH solution (5 M) was added, the pH and fluorescence spectrum recorded. This procedure was repeated until the required end point of the titration was reached. pKa values were an average of three independent runs.

### **pKa Titration of 1b**

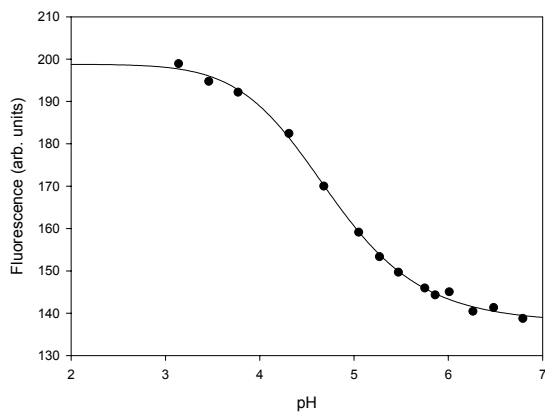

**pKa 1b = 4.8**
